# Supplementary material
Source: PubMed Central journal article supplement (PMC3707562)
Supplement: supp_pp.113.217497_217497Supplemental_text.pdf [file supp_pp.113.217497_217497Supplemental_text.pdf]

## SUPPLEMENTAL FIGURE LEGENDS

**Figure S1.** SEM images illustrating leaf surfaces of two *Oryza* species which were used to calculate stomatal density and size. Analyses showed *O. alta* (A,B) has low density and size of stomates on each side of the lamina; *O. barthii* (C,D) had among the highest stomatal density and size in both lamina surfaces. Scale bars = 200  $\mu\text{m}$  from A to D. See Supplemental Table S3 for data on stomata across *Oryza* accessions.

**Figure S2.** A, example of light microscopy image of leaf cross-section (*O. australiensis*, 21) used to estimate the leaf mesophyll volume occupied by Intercellular Air Space (IAS, in red). B, Schematic drawing showing the method of estimating the extent of cell surface lobing as cell perimeter tortuosity. This was calculated as arc-chord ratio: black line is the perimeter of mesophyll cell section (arc) and red line is the perimeter of the cell section circumscribed area (chord). ch, chloroplast; m, mitochondria.

**Figure S1.** SEM images illustrating leaf surfaces of two *Oryza* species which were used to calculate stomatal frequency and size. Analyses showed *O. alta* (A,B) has low density and size of stomates on each side of the lamina; *O. barthii* (C,D) had among the highest stomatal density and size in both lamina surfaces. Scale bars = 200  $\mu\text{m}$  from A to D. See Supplemental Table S3 for data on stomata across *Oryza* accessions.

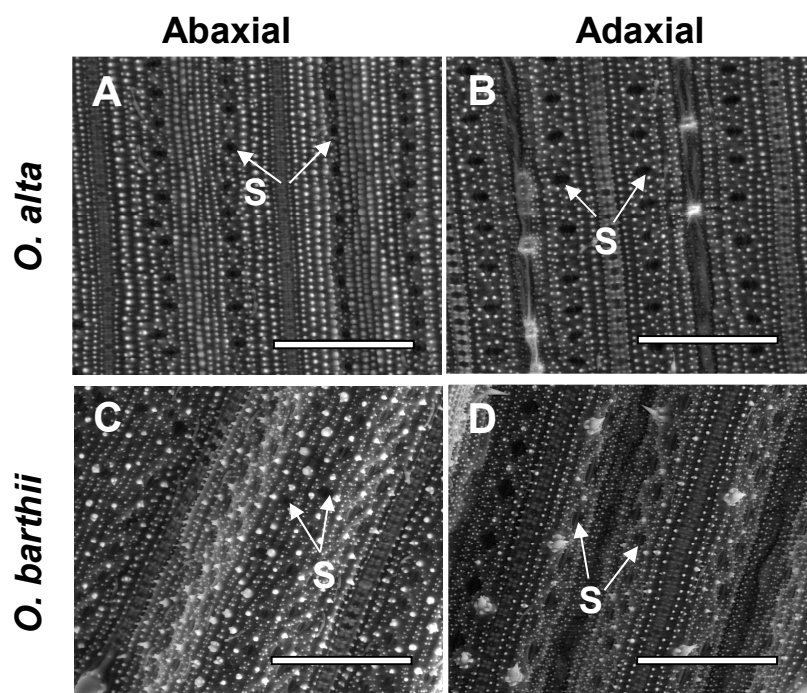

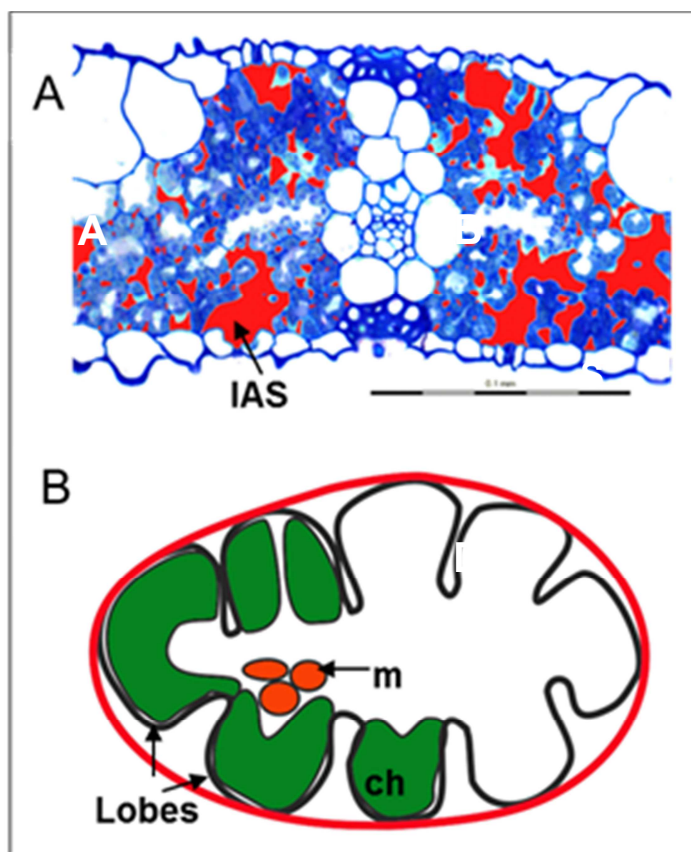

**Figure S2.** A, example of light microscopy image of leaf cross-section (*O. australiensis*, 21) used to estimate the leaf mesophyll volume occupied by Inter-cellular Air Space (IAS, in red). B, Schematic drawing showing the method of estimating the extent of cell surface lobing as cell perimeter tortuosity. This was calculated as arc-chord ratio: black line is the perimeter of mesophyll cell section (arc) and red line is the perimeter of the cell section circumscribed area (chord). ch, chloroplast; m, mitochondria.

### Supplemental Materials and Methods S1. Estimate of cell volume from values of $a_{\text{cell}}$ .

The mean (luminal) M cell section area in leaf cross-sections ( $a_{\text{cell}}$ ,  $\mu\text{m}^2$ ) was determined for each accession (n= 3). In addition, in each leaf cross section, the three highest  $a_{\text{cell}}$  were taken as M cell median sections ( $a_{\text{cell\_med}}$ ,  $\mu\text{m}^2$ ). Across *Oryza* accessions, mean  $a_{\text{cell\_med}}$  (n= 3) and  $a_{\text{cell}}$  had a close positive correlation (r= 0.83).

Leaf M cells in *Oryza* were assumed to be prolate spheroids; in the leaf cross section, they have the major axis (2a) twice the length of the other two minor axes ( $2b_1=2b_2=a$ ), as in Sage and Sage (2009) and Scafaro *et al.* (2011). In each leaf cross section, representative major and minor M cell section semiaxes (a and b, respectively) were calculated based on

$$a_{\text{cell\_med}} = \pi * a * b \quad (\text{Eq. S1})$$

and they were used to compute cell volume ( $\text{Vol}_{\text{cell}}$ ,  $\mu\text{m}^3$ ) as

$$\text{Vol}_{\text{cell}} = \frac{4}{3} \pi * a * b^2 \quad (\text{Eq. S2})$$

Cell surface lobing was not taken into account. Mean  $\text{Vol}_{\text{cell}}$  and  $a_{\text{cell}}$  across *Oryza* accessions had a close positive correlation (r = 0.83; P< 0.05). In addition, in each leaf cross section, the M cell surface area ( $a_{\text{cell\_surf}}$ ) corresponding to  $\text{Vol}_{\text{cell}}$  was calculated as

$$a_{\text{cell\_surf}} = 2\pi * b^2 + 2\pi \frac{ab}{\epsilon} * \sin^{-1} \epsilon \quad (\text{Eq. S3})$$

where a and b are the major and minor M cell section semiaxes; and  $\epsilon = (\sqrt{a^2 - b^2}) / a = 0.8660$  is the eccentricity parameter. Equations S2 and S3 were taken from Beyer, 1978.  $a_{\text{cell\_surf}}$  was edited to take into account for  $\text{Lob}_{\text{cell}}$ . The mean  $P/a_{\text{cell}}$  ratio (see list of leaf traits in Table 2) and the mean  $a_{\text{cell\_surf}} / \text{Vol}_{\text{cell}}$  ratio across *Oryza* accessions showed a positive correlation (r= 0.60).

### LITERATURE CITED

**Beyer WH** (1978) Handbook of mathematical sciences. 5<sup>th</sup> edition, CRC Press, Boca Raton, FL,

USA

**Sage TL, Sage RF** (2009) The functional anatomy of rice leaves: implications for refixation of photorespiratory CO<sub>2</sub> and efforts to engineer C<sub>4</sub> photosynthesis into rice. *Plant Cell Physiol* **50**: 756-772

**Scafaro AP, von Caemmerer S, Evans JR, Atwell BJ** (2011) Temperature response of mesophyll conductance in cultivated and wild *Oryza* species with contrasting mesophyll cell wall thickness. *Plant Cell Environ* **34**: 1999-2008

### **Supplemental Materials and Methods S2. Magnitude of the CO<sub>2</sub> diffusion leaks into and from the Fluorometer Leaf Chamber and its effect on A and C<sub>i</sub> calculation**

A quantitative analysis of CO<sub>2</sub> leakage into and from the LI-COR 6400XT Fluorometer Leaf Chamber was performed, as suggested by LI 6400XT manual (LI-COR Biosciences, 2008) and following Flexas *et al.* (2007) and Rodegheiro *et al.* (2007) suggestions. A portion of a dead and dry leaf of *Oryza sativa* IR64 was enclosed in the cuvette having one neoprene (below) and one polyethylene (above) foam gasket; synthetic rubber (*Terostat IX*, HenkelTechnologies, Düsseldorf, Germany) was used to improve the sealing. Air surrounding the cuvette was ventilated: the ambient CO<sub>2</sub> molar fraction nearby the chamber was constant during the test (400 μmol CO<sub>2</sub> mol<sup>-1</sup> air). The same molar bulk flow rate through the chamber which was adopted for leaf measurements was employed (300 μmol air s<sup>-1</sup>); chamber block temperature was set at 30°C. Drierite knob was turned to bypass, so that there would be corresponding H<sub>2</sub>O molar fraction (mmol H<sub>2</sub>O mol<sup>-1</sup> air) inside the cuvette and in the surrounding air.

Several C<sub>a</sub> values over the range from 40 to 1500 μmol CO<sub>2</sub> mol<sup>-1</sup> air were imposed to the LI-COR 6400XT equipment; at each C<sub>a</sub>, the CO<sub>2</sub> molar concentrations measured by chamber's inlet and outlet gas analyzers (C<sub>r</sub> and C<sub>s</sub>, μmol CO<sub>2</sub> mol<sup>-1</sup> air, respectively) were recorded. Three replicates were taken. The gradients between C<sub>r</sub> and C<sub>s</sub> [(C<sub>r</sub>-C<sub>s</sub>)<sub>leak</sub>, μmol CO<sub>2</sub> mol<sup>-1</sup> air] were calculated and plotted versus C<sub>s</sub>: a linear model was adopted to fit the data

$$(C_r - C_s)_{\text{leak}} = -0.0008C_s + 0.3630 \quad (R^2 = 0.96; P < 0.001) \quad (\text{Eq. S4})$$

From the leaf gas exchange measurements taken on the *Oryza* accessions the value of A was

then calculated ( $\mu\text{mol CO}_2 \text{ m}^{-2} \text{ s}^{-1}$ ) at each imposed  $C_a$ , *i.e.* at each  $C_s$ , as

$$A = \frac{F(C_r - C_s)}{100S} - C_s E + \frac{F(C_r - C_s)_{\text{leak}}}{100S} \quad (\text{Eq. S5})$$

according to the LI-COR 6400XT manual (LI-COR Biosciences, 2008);  $F$  is the molar flow rate ( $\mu\text{mol air s}^{-1}$ );  $(C_r - C_s)$  is the gradient of  $\text{CO}_2$  molar concentration ( $\mu\text{mol CO}_2 \text{ mol}^{-1} \text{ air}$ ) measured by chamber's inlet and outlet gas analyzers;  $S$  is the surface area of the chamber lumen ( $\text{m}^2$ );  $E$  is the transpiration rate per unit leaf surface area ( $\text{mol H}_2\text{O m}^{-2} \text{ s}^{-1}$ ); and  $(C_r - C_s)_{\text{leak}}$  is the differential of  $\text{CO}_2$  molar concentration ( $\mu\text{mol CO}_2 \text{ mol}^{-1} \text{ air}$ ) due to  $\text{CO}_2$  diffusion leaks which was provided by Eq. S4.

As reported by Flexas *et al.* (1997),  $\text{CO}_2$  leaks into and from the leaf chamber affect  $A$  and  $C_i$  in opposite direction; see the LI-COR 6400XT manual (LI-COR Biosciences, 2008) for the equation 1-18 (which includes  $A$ ) adopted to calculate  $C_i$ .

## LITERATURE CITED

- Flexas J, Diaz-Espejo A, Berry JA, Cifre J, Galmes J, Kaldenhoff R, Medrano H, Ribas-Carbo M** (2007) Analysis of leakage in IRGA's leaf chambers of open gas exchange systems: quantification and its effects in photosynthesis parameterization. *J Exp Bot* **58**: 1533–1543
- LI-COR Biosciences** (2008) Using the LI 6400/LI-6400 XT Portable Photosynthesis System. Manual version 6. Book 1. LI-COR Biosciences, NE, USA
- Rodeghiero M, Niinemets Ü, Cescatti A** (2007) Major diffusion leaks of clamp-on leaf cuvettes still unaccounted: how erroneous are the estimates of Farquhar *et al.* model parameters? *Plant Cell Environ* **30**: 1006-1022

## Supplemental Materials and Methods S3

### Fick's laws applied to estimate $g_m$

Based on (First and Second) Fick's Laws (Nobel, 2009), under the assumptions of isothermal and isobaric conditions and of absence of sources and sinks along the one-dimensional diffusion

path, the flow for species  $j$  in a solution through a barrier can be calculated as:

$$J_j = \frac{D_j * K_j * A_b * (C_{j1} - C_{j2})}{d} \quad (\text{Eq. S6})$$

where  $J_j$  is the flux for species  $j$  ( $\text{mol s}^{-1}$ ),  $D$  is the diffusion coefficient ( $\text{m}^2 \text{s}^{-1}$ ),  $K_j$  is the partition coefficient,  $A_b$  is the barrier cross-sectional area ( $\text{m}^2$ ),  $C_j$  is the concentration of  $j$  before and after the barrier ( $\text{mol j m}^{-3} \text{ air}$ ),  $d$  is the path length ( $\text{m}$ ).

When the species is  $\text{CO}_2$  that diffuses in the leaf mesophyll from Intercellular Air Space (IAS) to chloroplast stroma in a liquid solution through cell wall and membranes, the barrier cross-section area  $A_b$  could be represented by the mesophyll cell surface area exposed to IAS expressed per unit (one side) leaf surface area ( $S_{\text{mes}}$ ,  $\mu\text{m}^2 \mu\text{m}^{-2}$ ) and the  $\text{CO}_2$  flux density, which corresponds to net photosynthetic rate per unit leaf surface area ( $A$ ,  $\text{mol CO}_2 \text{ m}^{-2} \text{ s}^{-1}$ ), could be calculated as:

$$A = \frac{D_{\text{CO}_2} * K_{\text{CO}_2} * S_{\text{mes}} * (C_i - C_c)}{d} \quad (\text{Eq. S7})$$

where  $C_i$  and  $C_c$  are intercellular and chloroplastic  $\text{CO}_2$  concentration ( $\text{mol CO}_2 \text{ m}^{-3} \text{ air}$ ), respectively. Given that the equation based on Fick's Laws can usually be applied to calculate mesophyll conductance to  $\text{CO}_2$  diffusion ( $g_m$ ,  $\text{m s}^{-1}$ )

$$g_m = \frac{A}{(C_i - C_c)} \quad (\text{Eq. S8})$$

and replacing  $A$  with Eq. S7,  $g_m$  corresponds to

$$g_m = \frac{D_{\text{CO}_2} * K_{\text{CO}_2} * S_{\text{mes}}}{d} \quad (\text{Eq. S9})$$

and

$$\frac{g_m}{S_{\text{mes}}} = \frac{D_{\text{CO}_2} * K_{\text{CO}_2}}{d} \quad (\text{Eq. S10})$$

where the second term corresponds to permeability to  $\text{CO}_2$  ( $\text{m s}^{-1}$ ) from Intercellular Air Space to

chloroplasts in a liquid solution through cell wall and membranes (Nobel, 2009). In this term,  $d$  is the path length for  $\text{CO}_2$  to move from IAS to chloroplasts. In the present study  $\text{Thick}_{\text{cw}}$  is considered a significant component of  $d$ , based on the evidence that the chloroplasts during the light time are anchored against the cell membrane/walls that directly face the IAS (Takagi *et al.*, 2009).

Vice-versa,  $S_{\text{mes}}/g_{\text{m}}$  can be taken as a measure of the reciprocal of permeability to  $\text{CO}_2$ , *i.e.* of diffusive resistance in the liquid phase, from the IAS to chloroplasts. Note in this study,  $S_{\text{mes}}/g_{\text{m}}$  was used, which has a very high correlation with  $S_{\text{chl}}/g_{\text{m}}$  (estimated by Evans *et al.*, 2009) due to the high percentage of chloroplast covering the cell walls exposed to IAS.

#### LITERATURE CITED

- Evans JR, Kaldenhoff R, Genty B, Terashima I** (2009) Resistances along the  $\text{CO}_2$  diffusion pathway inside leaves. *J Exp Bot* **60**: 2235-2248
- Nobel PS** (2009) *Physicochemical and environmental plant physiology*. 4<sup>th</sup> edition, Academic Press, San Diego, CA
- Takagi S, Takamatsu H, Sakurai-Ozato N** (2009) Chloroplast anchoring: its implications for the regulation of intracellular chloroplast distribution. *J Exp Bot* **60**: 3301-3310
